# Supplementary material for: A Combination of Virulent and Non-Productive Phages Synergizes the Immune System against Salmonella Typhimurium Systemic Infection
Source: MDPI journal article supplement (doi:10.3390/ijms232112830), 2022-10-24
Supplement: s1 [file s1]

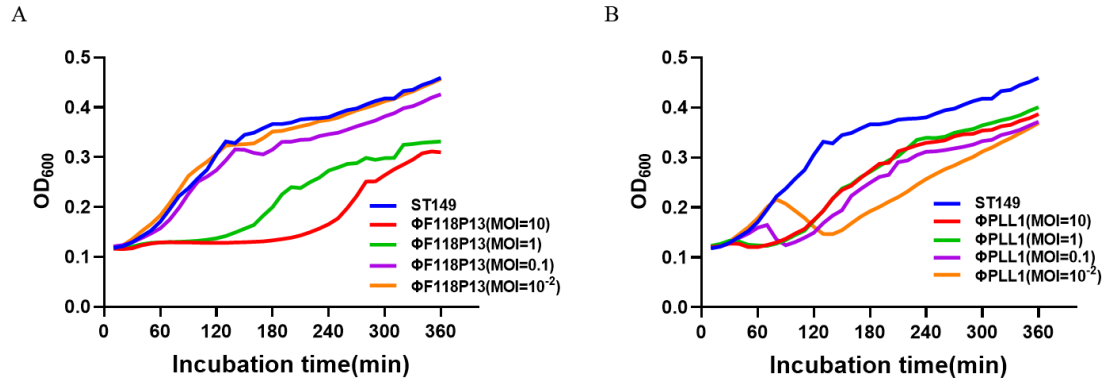

**Supplementary Figure S1.** Lytic activity of  $\Phi$ F118P13 (A) and  $\Phi$ PLL1 (B) on *S. Typhimurium* ST149 at different MOIs *in vitro*.

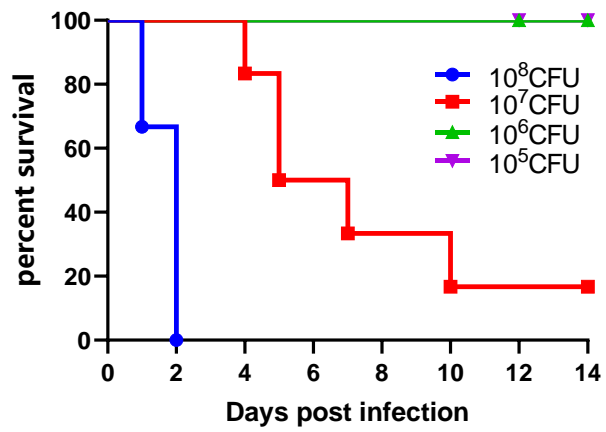

**Supplementary Figure S2.** The lethality of ICR mice by intraperitoneal injection with different doses of *S. Typhimurium* ST149.

**Supplementary Table S1.** Host range of *Salmonella* phage PLL1 and F118P13.

| Strain   | Bacteria species              | Sensitivity to     | Sensitivity to |
|----------|-------------------------------|--------------------|----------------|
|          |                               | ΦPLL1 <sup>a</sup> | ΦF118P13       |
| SPG8     | <i>Salmonella</i> Pullorum    | ++                 | ++             |
| SPL4K    | <i>Salmonella</i> Pullorum    | -                  | -              |
| ST722    | <i>Salmonella</i> Typhimurium | ++                 | ++             |
| ST149    | <i>Salmonella</i> Typhimurium | ++                 | ++             |
| ST699    | <i>Salmonella</i> Typhimurium | ++                 | ++             |
| ST18Y15  | <i>Salmonella</i> Typhimurium | ++                 | ++             |
| CVCC3377 | <i>Salmonella</i> Enteritidis | ++                 | ++             |
| SK18Y23  | <i>Salmonella</i> Kentucky    | -                  | -              |
| SK18Y24  | <i>Salmonella</i> Kentucky    | -                  | -              |
| SK147    | <i>Salmonella</i> Kentucky    | -                  | -              |
| SL151    | <i>Salmonella</i> London      | -                  | -              |
| JAF2     | <i>Klebsiella pneumoniae</i>  | -                  | -              |
| JA4      | <i>Klebsiella pneumoniae</i>  | -                  | -              |
| JA3-1    | <i>Escherichia coli</i>       | -                  | -              |
| JAF1     | <i>Escherichia coli</i>       | -                  | -              |
| FC2-2    | <i>Proteus mirabilis</i>      | -                  | -              |
| T102-2   | <i>Proteus mirabilis</i>      | -                  | -              |

a: “++”, clear plaque, “-” no plaque.

**Supplementary Table S2.** Pathological feature scores used in this study.

| Organ  | Lesion                                | Score |
|--------|---------------------------------------|-------|
| Kidney | hyperplasia                           | 1     |
|        | hemorrhage                            | 2     |
|        | necrosis                              | 3     |
| Lung   | hyperplasia                           | 1     |
|        | exudation                             | 2     |
|        | hemorrhage                            | 3     |
| Liver  | organizational barriers               | 1     |
|        | cellular swelling                     | 1     |
|        | inflammatory hyperplasia              | 2     |
|        | necrosis                              | 3     |
| Spleen | multinucleated giant cell hyperplasia | 1     |
|        | exudation                             | 2     |
|        | lymphocytosis                         | 2     |
|        | white pulp reduction                  | 3     |
|        | marginal zone reduction               | 3     |
